# Supplementary material
Source: publisher figshare collection journal article supplement (https://tandf.figshare.com/ndownloader/files/17470451)
Supplement: Supplementary file 1 [file 17470451]

**Supporting information**

International Journal of Phytoremediation

**Bisphenol A removal from a plastic industry wastewaterby *Dracaena sanderiana* endophytic bacteriaand *Bacillus cereus* NI**

Bongkotrat Suyamud1, Paitip Thiravetyan2, Geoffrey Michael Gadd3, Bunyarit Panyapinyopol1,5, and [Duangrat Inthorn](https://www.google.co.th/url?sa=t&rct=j&q=&esrc=s&source=web&cd=1&cad=rja&uact=8&ved=0ahUKEwj9luOczfDQAhUIr48KHUZwC_gQFggbMAA&url=https%3A%2F%2Fwww.researchgate.net%2Fprofile%2FDuangrat_Inthorn2&usg=AFQjCNF1CDdQm4OKPLbX-4ogjj6O19ggQw&sig2=gjrI59F8Ht36Ug3N9qjmnw&bvm=bv.141320020,d.c2I)4,5*

1Department of Sanitary Engineering, Faculty of Public Health, Mahidol University, Bangkok

10400, Thailand

2School of Bioresources and Technology, King Mongkut's University of Technology Thonburi, Bangkok 10150, Thailand

3Geomicrobiology Group, School of Life Sciences, University of Dundee, Dundee DD1 5EH, Scotland, UK

4Department of Environmental Health Sciences, Faculty of Public Health, Mahidol University,

Bangkok, 10400, Thailand

5Center of Excellence on Environmental Health and Toxicology (EHT), CHE, Ministry of Education, Bangkok.

***** Corresponding author. Tel./fax: +66 2 35 48525.

*E-mail address:* [duangrat.int@mahidol.ac.th](mailto:duangrat.int@mahidol.ac.th) (D. Inthorn).

**Experimental Details**

1. BPA analysis by HPLC

BPA was analyzed by a reverse phase HPLC using a C18 column (Luna, 250 × 4.6mm, Phenomenex) equipped with a 221 nm UV detector. The HPLC mobile phase is a solution containing acetonitrile–Milli-Q water (1:1, v/v). With this analytical method, a flow rate of 1 ml min−1 and the retention time was 8.373 ± 0.02 min.

2. Quantitative real-time PCR

qPCR was performed using the Light Cycler® 96. Each qPCR reaction was performed in a total volume of 20 μL containing 10 μL 2X KAPA SYBR FAST qPCR Master Mix Universal (KAPA BIOSYSTEMS), 0.4 μL of each primer (200 nM), 0.4 μL of 50X ROX Low (KAPABIOSYSTEMS) and 1 μL of template DNA (20 ng) in triplicate. qPCR conditions were as followed: an initial denaturation at 95 ºC for 10 min, 40 cycles of denaturation at 95 ºC for 30 s annealing/extension at 60 ºC for 10 s and 72 ºC for 20 s followed by one cycle of 95 ºC for 1 min, 55 ºC for 30 s and 95 ºC for 30 s. For the RT-PCR standard curves, cultures of endophytic bacteriacells were grown to a cell density of 109 CFU mL−1 in LB broth at 30 °C and 150 rpm, and then DNA samples extracted with a volume of 1 mL. Subsequently, 10-fold serial dilutions were used as a standard curve for RT-PCR analysis. The diluted target gene copy number ranged between 108 to 102.

qPCR description

| Slope | -3.4675 |
| --- | --- |
| Efficiency | 1.94 |
| Error | 1.51 |
| R2 | 0.97 |
| Y-intercept | 45.43 |

**Supplementary Table S1.** qPCR description
